# Supplementary material for: Next-Generation Sequencing Analysis of the Tineola bisselliella Larval Gut Transcriptome Reveals Candidate Enzymes for Keratin Digestion
Source: MDPI journal article supplement (doi:10.3390/genes12081113), 2021-07-22
Supplement: s1 [file s1]

## Supplementary

**Supplementary Table S1.** BUSCO V3 databases used for BUSCO analysis.

| Database name          | Download date |
|------------------------|---------------|
| insecta_odb9           | 12 Apr 2019   |
| endopterygota_odb9     | 19 Aug 2019   |
| bacteria_odb9          | 16 Sep 2019   |
| bacillales_odb9        | 23 Oct 2019   |
| clostridia_odb9        | 23 Oct 2019   |
| proteobacteria_odb9    | 23 Oct 2019   |
| saccharomycetales_odb9 | 16 Sep 2019   |
| saccharomyceta_odb9    | 23 Oct 2019   |

**Supplementary Table S2.** Statistics of the de novo gut transcriptome assembly of *Tineola bisselliella* larvae.

|                           |             |
|---------------------------|-------------|
| Number of contig          | 428,221     |
| Smallest contig [bp]      | 177         |
| Largest contig [bp]       | 50,898      |
| Assembled bases [bp]      | 518,270,755 |
| Mean contig length [bp]   | 1,210       |
| Number of contigs <200 bp | 60          |
| Number of contigs >1 kbp  | 97,092      |
| Number of contigs >10 kbp | 7,404       |
| GC content [%]            | 36.06       |
| N90 [bp]                  | 377         |
| N50 [bp]                  | 3,772       |

**Supplementary Table S3.** TransDecoder results for the *T. bisselliella* de novo transcriptome assembly.

| Status         | Absolute abundance | Relative abundance |
|----------------|--------------------|--------------------|
| complete       | 49,819             | 52.83%             |
| 5prime_partial | 12,533             | 13.29%             |
| 3prime_partial | 8,711              | 9.24%              |

|          |        |        |
|----------|--------|--------|
| internal | 23,241 | 24.64% |
|----------|--------|--------|

**Supplementary Table S4.** BUSCO summary for the transcriptome assembly of *T. bisselliella* larvae guts for different BUSCO databases. <sup>1</sup>: Input: contigs with coverage exclusively in poly(A)dep. samples; <sup>2</sup>: Input: contigs with coverage in poly(A)-enriched and poly(A)-depleted samples.

| BUSCO odb9                         | Complete single [%] | Complete duplicate [%] | Fragmented [%] | Missing [%] | Total |
|------------------------------------|---------------------|------------------------|----------------|-------------|-------|
| <b>Bacteria</b> <sup>1</sup>       | 30.41               | 0.68                   | 34.46          | 34.46       | 148   |
| <b>Proteobacteria</b> <sup>1</sup> | 16.74               | 0.90                   | 47.96          | 34.39       | 221   |
| <b>Bacillales</b> <sup>1</sup>     | 13.11               | 0.57                   | 26.24          | 60.08       | 526   |
| <b>Clostridia</b> <sup>1</sup>     | 23.23               | 0.00                   | 42.52          | 34.25       | 254   |
| <b>Saccharomyceta</b> <sup>2</sup> | 24.84               | 31.67                  | 14.10          | 29.39       | 1,759 |
| <b>Insecta</b> <sup>2</sup>        | 15.20               | 83.53                  | 0.60           | 0.66        | 1,658 |
| <b>Endopterygota</b> <sup>2</sup>  | 17.32               | 80.10                  | 1.57           | 1.02        | 2,442 |

Please note that due to rounding, values may not add up to exactly 100%.

**Supplementary Table S5.** Summary of the functional transcriptome annotation. Peptide sequences from open reading frames (ORF) prediction were used as input for the analysis, except for the NT database, where the contigs were used as input. Percentage of ORFs was calculated with the 94,304 ORFs as base value, total number of 428,221 contigs was the base value for the calculation of contig percentage.

| Database | Contigs | ORF [%] | Contigs [%] |
|----------|---------|---------|-------------|
| nr       | 78,571  | 83.32   | 18.35       |
| UniProt  | 78,859  | 83.62   | 18.42       |
| nt       | 58,697  | -       | 13.71       |
| Pfam     | 60,341  | 63.99   | 14.09       |
| MEROPS   | 2,613   | 2.77    | 0.61        |

**Supplementary Table S6.** Genomes used as references to map reads from the poly(A)-depleted fraction against bacterial genomes.

| Accession number | Reference name                                                           |
|------------------|--------------------------------------------------------------------------|
| NC_000964.3      | <i>Bacillus subtilis</i> subsp. <i>subtilis</i> str. 168 complete genome |
| NZ_CP048852.1    | <i>Bacillus tequilensis</i> strain EA-CB0015 chromosome, complete genome |
| NZ_CP021130.1    | <i>Meiothermus taiwanensis</i> WR-220                                    |

|               |                                                                                   |
|---------------|-----------------------------------------------------------------------------------|
| NC_004722.1   | <i>Bacillus cereus</i> ATCC 14579, complete sequence                              |
| NC_005957.1   | [ <i>Bacillus thuringiensis</i> ] serovar konkukian str. 97-27, complete sequence |
| NC_006270.3   | <i>Bacillus licheniformis</i> DSM 13 = ATCC 14580, complete sequence              |
| NZ_CP011007.1 | <i>Bacillus pumilus</i>                                                           |
| NZ_CP011663.1 | <i>Clostridium sporogenes</i> DSM795 chromosome, complete genome                  |

**Supplementary Table S7.** Differentially expressed contigs of *T. bisselliella* larval guts with trypsin domains (adjusted p-value  $\leq 0.05$  and  $\log_2FC \geq 1.5$ ). The column “diet induced” shows whether the contig was found in samples of a keratin-rich or keratin-free diet. NR annotation column shows the best hit to NCBI nr database. complete (domain coverage  $\geq 90\%$ ); p: partial (query coverage  $\geq 90\%$ ); f: fragment (all others). The base mean count column shows the average of the normalized counts from DESeq2. In the absolute  $\log_2$  fold-change column the maximum  $\log_2FC$  from the DESeq2 analysis is shown.

| ORF ID              | Diet induced | Domain status | NR annotation                                                       | Base mean count | Absolute $\log_2FC$ |
|---------------------|--------------|---------------|---------------------------------------------------------------------|-----------------|---------------------|
| DN1221_c0_g2_i2.p1  | keratin-rich | complete      | collagenase [ <i>Bombyx mori</i> ]                                  | 46096.50        | 3.12                |
| DN1772_c1_g1_i6.p1  | keratin-free | partial       | chymotrypsin-like serine protease 4 [ <i>Antheraea yamamai</i> ]    | 12.49           | 3.52                |
| DN18226_c0_g2_i5.p1 | keratin-rich | complete      | PREDICTED: serine proteinase stubble [ <i>Plutella xylostella</i> ] | 23.51           | 4.97                |
| DN1936_c1_g1_i3.p1  | keratin-rich | fragment      | serine protease 36 [ <i>Mamestra configurata</i> ]                  | 39872.50        | 2.95                |
| DN21748_c0_g1_i6.p1 | keratin-rich | complete      | serine proteinase stubble [ <i>Bombyx mori</i> ]                    | 28.80           | 9.14                |
| DN2565_c0_g1_i10.p1 | keratin-rich | complete      | PREDICTED: collagenase-like [ <i>Papilio polytes</i> ]              | 17066.42        | 6.01                |
| DN2565_c0_g1_i11.p1 | keratin-rich | complete      | serine protease 13 [ <i>Antheraea pernyi</i> ]                      | 4348.76         | 5.84                |
| DN2565_c0_g1_i1.p1  | keratin-rich | complete      | serine protease 13 [ <i>Antheraea pernyi</i> ]                      | 31751.34        | 3.94                |
| DN2565_c0_g1_i3.p1  | keratin-free | complete      | collagenase-like [ <i>Pieris rapae</i> ]                            | 935.19          | 3.37                |
| DN2565_c0_g1_i6.p1  | keratin-rich | complete      | serine protease 13 [ <i>Antheraea pernyi</i> ]                      | 211808.73       | 4.27                |
| DN2565_c0_g1_i8.p1  | keratin-rich | complete      | serine protease 13 [ <i>Antheraea pernyi</i> ]                      | 347.35          | 5.17                |
| DN2565_c0_g1_i9.p1  | keratin-rich | fragment      | PREDICTED: collagenase-like [ <i>Papilio xuthus</i> ]               | 1661.09         | 4.31                |
| DN25_c0_g1_i12.p1   | keratin-rich | complete      | PREDICTED: collagenase-like [ <i>Papilio machaon</i> ]              | 40378.89        | 6.81                |
| DN25_c0_g1_i18.p1   | keratin-rich | partial       | PREDICTED: collagenase-like [ <i>Plutella xylostella</i> ]          | 43.47           | 4.09                |
| DN25_c0_g1_i3.p1    | keratin-rich | complete      | PREDICTED: collagenase-like [ <i>Papilio machaon</i> ]              | 147.22          | 6.10                |
| DN2656_c2_g1_i5.p1  | keratin-free | complete      | hypothetical protein B5V51_4161 [ <i>Heliothis virescens</i> ]      | 3375.24         | 4.11                |
| DN2656_c2_g1_i6.p1  | keratin-free | partial       | hypothetical protein B5V51_4161 [ <i>Heliothis virescens</i> ]      | 10.21           | 3.65                |

|                    |              |          |                                                                                |         |       |
|--------------------|--------------|----------|--------------------------------------------------------------------------------|---------|-------|
| DN3115_c0_g1_i8.p1 | keratin-rich | complete | PREDICTED: collagenase-like [ <i>Papilio machaon</i> ]                         | 7605.70 | 4.96  |
| DN381_c0_g1_i3.p2  | keratin-rich | fragment | serine protease [ <i>Spodoptera frugiperda</i> ]                               | 204.14  | 2.56  |
| DN381_c0_g1_i7.p1  | keratin-rich | complete | PREDICTED: brachyurin-like [ <i>Amyelois transitella</i> ]                     | 193.60  | 2.46  |
| DN4341_c0_g1_i1.p1 | keratin-rich | complete | PREDICTED: mucin-17 [ <i>Plutella xylostella</i> ]                             | 204.68  | 11.52 |
| DN568_c0_g1_i28.p1 | keratin-free | complete | modular serine protease-like [ <i>Spodoptera litura</i> ]                      | 40.68   | 23.72 |
| DN568_c0_g1_i43.p1 | keratin-rich | complete | modular serine protease-like [ <i>Spodoptera litura</i> ]                      | 174.07  | 25.94 |
| DN5822_c0_g1_i4.p1 | keratin-free | complete | Chymotrypsin-2 [ <i>Papilio xuthus</i> ]                                       | 12.24   | 6.35  |
| DN625_c1_g1_i3.p1  | hybrid       | complete | PREDICTED: uncharacterized protein LOC105381678 [ <i>Plutella xylostella</i> ] | 9.90    | -     |
| DN7627_c0_g2_i4.p1 | keratin-rich | complete | hypothetical protein B5V51_13681 [ <i>Heliothis virescens</i> ]                | 600.23  | 1.92  |
| DN902_c0_g4_i1.p1  | keratin-rich | complete | serine proteinase stubble-like isoform X1 [ <i>Helicoverpa armigera</i> ]      | 79.39   | 6.60  |
